# Supplementary material for: Isolation and Functional Analysis of MbCBF2, a Malus baccata (L.) Borkh CBF Transcription Factor Gene, with Functions in Tolerance to Cold and Salt Stress in Transgenic Arabidopsis thaliana
Source: MDPI journal article supplement (doi:10.3390/ijms23179827), 2022-08-29
Supplement: s1 [file s1]

**Table S1.** Primers used in this study

| Primer Name        | Primer sequence (5'→3')   | Function                             |
|--------------------|---------------------------|--------------------------------------|
| <i>MbCBF2</i> -F   | ATGGATGCTTTCTCTCATTA      | Clone full length of <i>MbCBF2</i>   |
| <i>MbCBF2</i> -R   | CATTATGGAGTTTTTCCATTGA    | Clone full length of <i>MbCBF2</i>   |
| q-PCR-F            | CTCGCCCCATGTTTCATGAACTTGT | q-PCR for <i>MbCBF2</i>              |
| q-PCR-R            | GCGGCCATTTCTGCCGTGGGAAAA  | q-PCR for <i>MbCBF2</i>              |
| <i>Actin</i> -F    | ACACGGGGAGGTAGTGACAA      | q-PCR for Actin                      |
| <i>Actin</i> -R    | CCTCCAATGGATCCTCGTTA      | q-PCR for Actin                      |
| <i>AtCOR15a</i> -F | CAACAGAGGAATCACCAGCGA     | Clone full length of <i>AtCOR15a</i> |
| <i>AtCOR15a</i> -R | CTCTGCTGTCTTGTCGTGGTGT    | Clone full length of <i>AtCOR15a</i> |
| <i>AtRD29a</i> -F  | CAACGAGGGGAAGATAAAAGTGT   | Clone full length of <i>AtRD29a</i>  |
| <i>AtRD29a</i> -R  | AGCCAGATGATTTTGGAGCCT     | Clone full length of <i>AtRD29a</i>  |
| <i>AtCOR6.6</i> -F | ACAGGCGGGAAAGAGTAT        | Clone full length of <i>AtCOR6.6</i> |
| <i>AtCOR6.6</i> -R | TGGAAGGCATTCTTGTTG        | Clone full length of <i>AtCOR6.6</i> |
| <i>AtERD10</i> -F  | GCAGCAGGAGGAGAAGGG        | Clone full length of <i>AtERD10</i>  |
| <i>AtERD10</i> -R  | CACCAGGAAGAAGCCCATC       | Clone full length of <i>AtERD10</i>  |
| <i>AtCOR47</i> -F  | TGGTTGTAACGGAGCATC        | Clone full length of <i>AtCOR47</i>  |
| <i>AtCOR47</i> -R  | CCCCAAGAAATCAAACAA        | Clone full length of <i>AtCOR47</i>  |
| <i>AtRD29b</i> -F  | CAACGAGGGGAAGATAAAAGTGT   | Clone full length of <i>AtRD29b</i>  |
| <i>AtRD29b</i> -R  | AGCCAGATGATTTTGGAGCCT     | Clone full length of <i>AtRD29b</i>  |
| <i>AtNCED3</i> -F  | ATGGCTTCTTCACGGCACGG      | Clone full length of <i>AtNCED3</i>  |
| <i>AtNCED3</i> -R  | TTCCTTTGCCCTCGGACG        | Clone full length of <i>AtNCED3</i>  |
| <i>AtCAT1</i> -F   | CGCCATGCCGAAAAATACCC      | Clone full length of <i>AtCAT1</i>   |
| <i>AtCAT1</i> -R   | CTTGCCTGTCTGAATCCCAGGAC   | Clone full length of <i>AtCAT1</i>   |
| <i>AtP5CS</i> -F   | GATACGGATATGGCAAAGCG      | Clone full length of <i>AtP5CS</i>   |

|                    |                      |                                       |
|--------------------|----------------------|---------------------------------------|
| <i>AtP5CS-R</i>    | CCAAGTCCAAATCGGAAACC | Clone full length of <i>AtP5CS</i>    |
| <i>AtPIF1-F</i>    | ATTTCGAGCACAGAGTAGA  | Clone full length of <i>AtPIF1</i>    |
| <i>AtPIF1-R</i>    | TCTACTCTGTGCTCGGAAAT | Clone full length of <i>AtPIF1</i>    |
| <i>AtPIF4-F</i>    | GCATCACAACCGACCGTAAG | Clone full length of <i>AtPIF4</i>    |
| <i>AtPIF4-R</i>    | ATTCCACTCCCCATCCACAT | Clone full length of <i>AtPIF4</i>    |
| <i>AtSnRK2.4-F</i> | GAGGAAATGGGGATGCAGAT | Clone full length of <i>AtSnRK2.4</i> |
| <i>AtSnRK2.4-R</i> | TTCTCACTTCTCCACTTGCG | Clone full length of <i>AtSnRK2.4</i> |

---

ATGGATGCTTTCTCTATTACTACGTGGACCCGACCCGGAATCATCGTCCGCTTCTGACGCCAACAGTTCTCGCCCCATGTTTCATGAACCTGTGG  
 M D A F S H Y Y V D P Q P E S S S A S D A N S S R P M F M N L S  
 GACGAGGAGTCTGCTGGCGTCCACTTACCGAAGAAGCAGGCTGGACGGAAGTTTAAAGAGACAAGGCACCCTGTGTACCGCGGTGTCCGG  
 D E E V L L A S T Y P K K Q A G R K K F K E T R H P V Y R G V R  
 AGGAGGAACCCGGCAAGTGGGTGTCCGAGGTCCGGGAGCCCAACAAAAGACAAGGATTGGCTGGGAACATTTCCACAGCCGAAATGGCCGCG  
 R R N S G K W V S E V R E P N K K T R I W L G T F P T A E M A A  
 CGCGCTCATGATGTGGCGGCCATTGCGCTGAGGGGAGGTGCGGCTTGCCTCAACTTTGCCGACTCTGCGTGGCGGCTACCAAGTCCCTGCGCTCCGCC  
 R A H D V A A I A L R G R S A C L N F A D S A W R L P V P A S A  
 AACGCGAAGGATATCAAACCTGCCGCGCGGAAGCAGCAGAACAGTTTCGGCCGGTGAAGAGTCGGATGAGGCTTGTGGTGCCTTCTGCGGTGGCT  
 N A K D I Q T A A A E A A E Q F R P V E E S D E A C G A S A V A  
 CCCTCGGAGTGACGTCAGCGTCGGAGCAACAAGTGCATTTTATGGATGAGGAAGCGTTTTTGGGATGCCGGGACTGCTGGCAAATATGGCTGAA  
 P S E C T S A S E Q Q V H F M D E E A V F G M P G L L A N M A E  
 GGAATGCTACTGCCTCCACCTCATTACAGTGACGATGATGACGTGTATGTTTATGCTGACGTGCCATTATGGAGTTTTTCCATTTGA  
 G M L L P P P H Y S D D D D V Y V Y A D V P L W S F S I \*

**Figure S1.** The predicted amino acid sequence and nucleotide of *MbCBF2* gene.
